# Supplementary material for: Polymorphism-based luminescence and morphology-dependent optical waveguide properties in 1 : 1 charge transfer cocrystals
Source: Royal Society of Chemistry journal article supplement (doi:10.1039/d0qm00606h), 2020-11-19
Supplement: d0qm00606h1.pdf [file d0qm00606h1.pdf]

## Supporting Information

### Polymorphism-Based Luminescence and Morphology-Dependent Optical Waveguide Property in the 1:1 Charge Transfer Cocrystals

Jing Wang,<sup>\*a,b</sup> Shuping Xu,<sup>c</sup> Aisen Li,<sup>c</sup> Lei Chen,<sup>a,b</sup> Weiqing Xu<sup>\*c</sup> and Hongyu Zhang<sup>c</sup>

**Table S1** The Crystallographic data of form  $\alpha$  and form  $\beta$  cocrystals derived from single-crystal X-ray diffraction measurements.

| <b>Crystal</b>                                  | <b>form <math>\alpha</math></b>                  |
|-------------------------------------------------|--------------------------------------------------|
| <b>Formula</b>                                  | C <sub>26</sub> H <sub>14</sub> N <sub>4</sub> O |
| <b>Formula weight( g/mol)</b>                   | 398.41                                           |
| <b>Crystal system</b>                           | monoclinic                                       |
| <b>Space-group</b>                              | P 21/c                                           |
| <b>Lattice parameter a (Å)</b>                  | 7.4866(4)                                        |
| <b>Lattice parameter b (Å)</b>                  | 28.6968(18)                                      |
| <b>Lattice parameter c (Å)</b>                  | 9.5251(6)                                        |
| <b>cell parameter <math>\alpha</math>(°)</b>    | 90                                               |
| <b>Lattice parameter <math>\beta</math>(°)</b>  | 92.720(3)                                        |
| <b>Lattice parameter <math>\gamma</math>(°)</b> | 90                                               |
| <b>Cell volume (Å<sup>3</sup>)</b>              | 2044.1(2)                                        |
| <b>Formula units per cell Z</b>                 | 4                                                |
| <b>Calculated density (g•cm<sup>-3</sup>)</b>   | 1.295                                            |
| <b>Mu(mm<sup>-1</sup>)</b>                      | 0.082                                            |
| <b>F(000)</b>                                   | 824.0                                            |
| <b>F(000)'</b>                                  | 824.31                                           |
| <b>h,k,l,(max)</b>                              | 9, 35, 11                                        |
| <b>Nref</b>                                     | 4172                                             |
| <b>R reflections</b>                            | 0.0481(2653)                                     |
| <b>wR2</b>                                      | 0.1196                                           |
| <b>CSD</b>                                      | NAFJIR                                           |

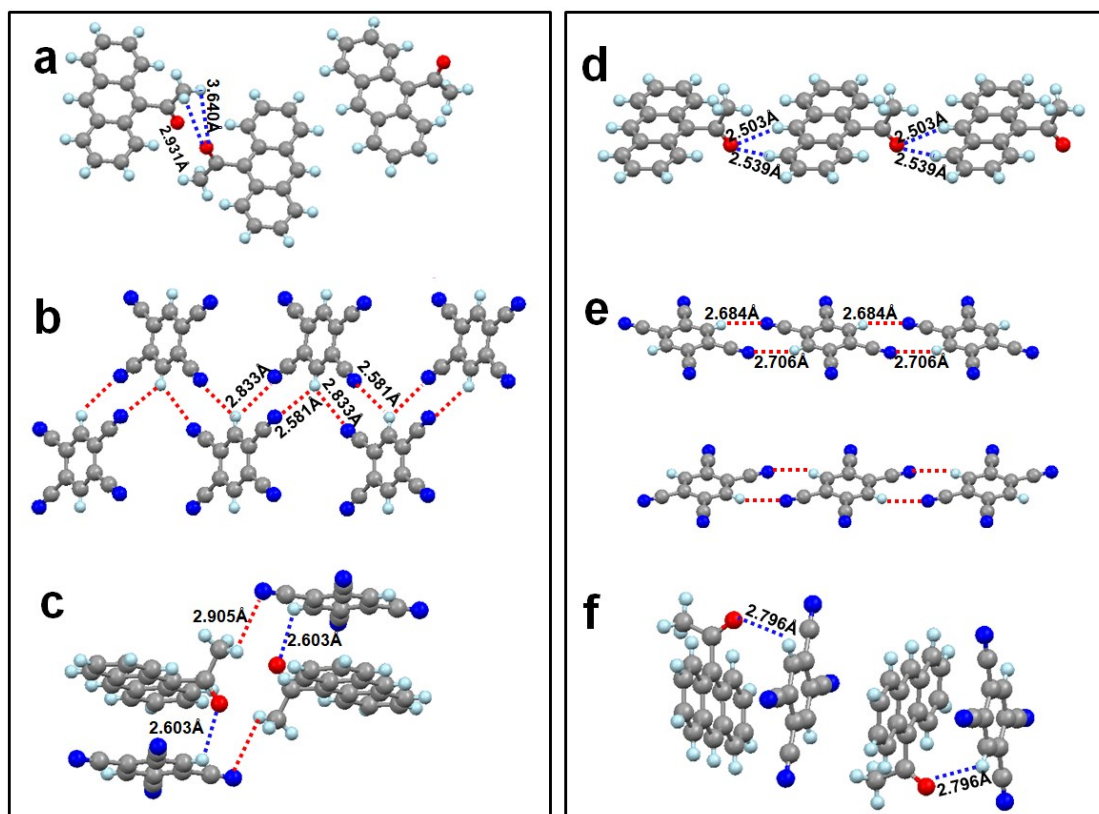

**Fig. S1** The intermolecular interactions of (a-c) form  $\alpha$  and (d-f) form  $\beta$  cocrystals.

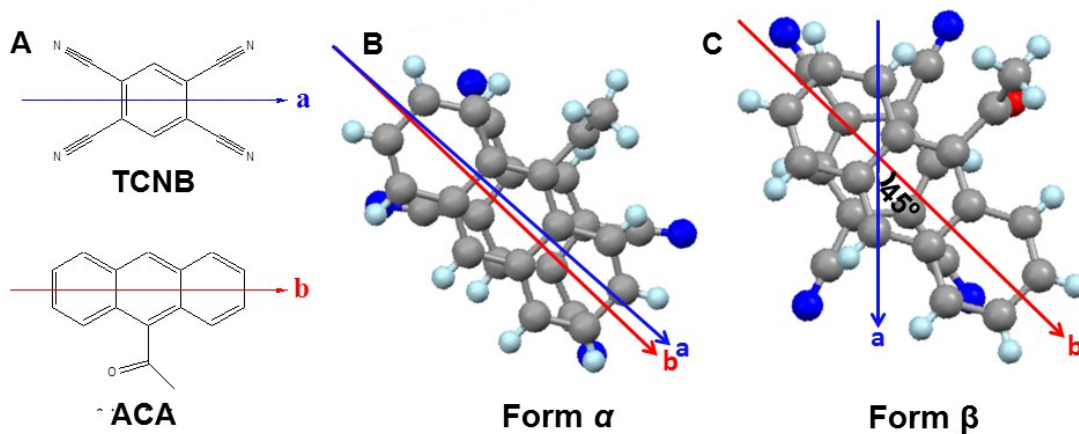

**Fig. S2** (A) Directions of ACA (marked as a) and TCNB (marked as b) are marked by arrowhead with different color. The Intermolecular  $\pi$ - $\pi$  interaction of ACA and TCNB with different rotation angles in (B) form  $\alpha$  and (C) form  $\beta$  cocrystals.

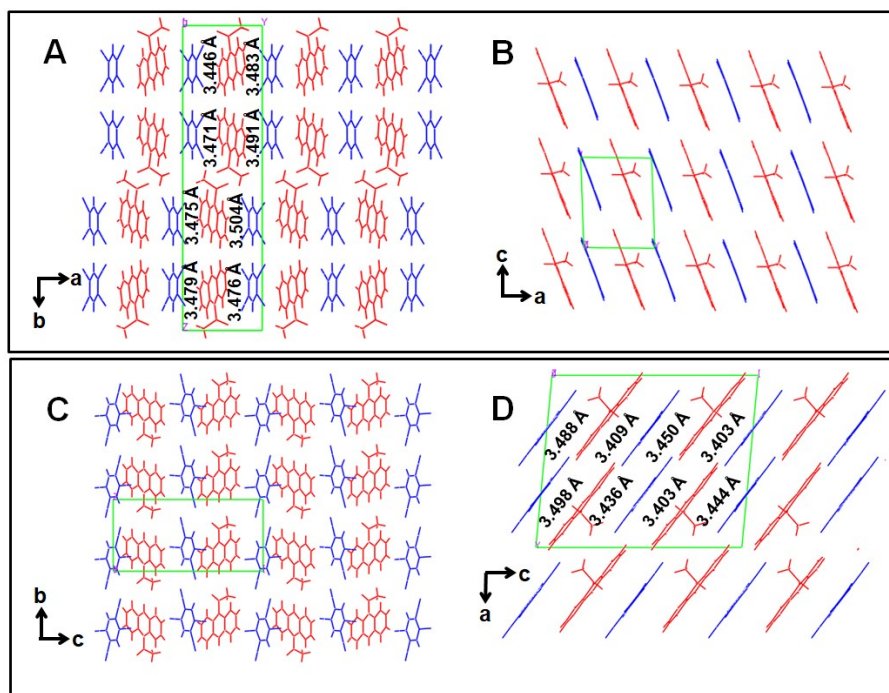

**Fig. S3** The interplanar distances between ACA and TCNB in the (A and B) form  $\alpha$  and (C and D) form  $\beta$  cocrystals.

**Table S2** The interplanar distances between ACA and TCNB in the form  $\alpha$  and form  $\beta$  from Fig. S3

| Crystal       | $d_{D-A}$ (Å)                                          | mean distance (Å) |
|---------------|--------------------------------------------------------|-------------------|
| form $\alpha$ | 3.504, 3.491, 3.483, 3.479, 3.476, 3.475, 3.471, 3.446 | 3.478             |
| form $\beta$  | 3.498, 3.488, 3.450, 3.444, 3.436, 3.409, 3.403, 3.403 | 3.441             |

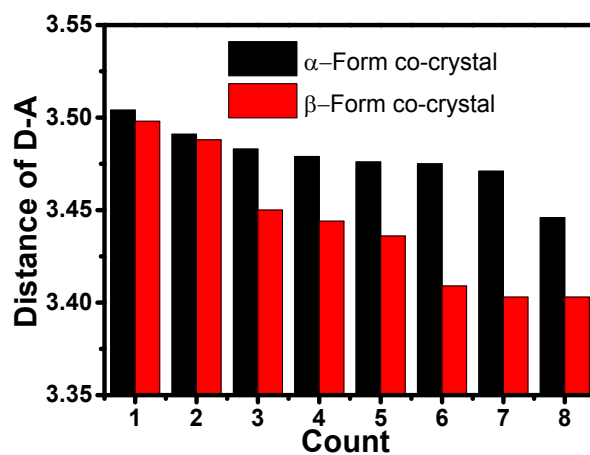

**Fig. S4** The Histogram of interplanar distances between ACA and TCNB in form  $\alpha$  (Black) and form  $\beta$  (Red) cocrystals from Table S2.

**Table S3** Intermolecular hydrogen bond interactions in form  $\alpha$  and form  $\beta$ .

| Crystal Intermolecular interactions    | form $\alpha$                                       |                   | form $\beta$                                         |                   |
|----------------------------------------|-----------------------------------------------------|-------------------|------------------------------------------------------|-------------------|
|                                        | C-H...X (X = O, N)                                  | Length of C-H...X | C-H...X (X = O, N)                                   | Length of C-H...X |
| Interactions of ACA and adjacent ACA   | C <sub>26</sub> -H <sub>26A</sub> ...O <sub>1</sub> | 3.640 Å           | C <sub>17</sub> -H <sub>17</sub> ...O <sub>1</sub> ; | 2.503 Å           |
|                                        | C <sub>26</sub> -H <sub>26B</sub> ...O <sub>1</sub> | 2.931 Å           | C <sub>19</sub> -H <sub>19</sub> ...O <sub>1</sub>   | 2.539 Å           |
| Interactions of TCNB and adjacent TCNB | C <sub>3</sub> -H <sub>3</sub> ...N <sub>4</sub>    | 2.581 Å           | C <sub>3</sub> -H <sub>3</sub> ...N <sub>3</sub>     | 2.684 Å           |
|                                        | C <sub>3</sub> -H <sub>3</sub> ...N <sub>2</sub>    | 2.833 Å           | C <sub>6</sub> -H <sub>6</sub> ...N <sub>2</sub>     | 2.706 Å           |
| Interactions of TCNB with stacking ACA | C <sub>6</sub> -H <sub>6</sub> ...O <sub>1</sub>    | 2.603 Å           | C <sub>6</sub> -H <sub>6</sub> ...O <sub>1</sub>     | 2.794 Å           |
|                                        | C <sub>26</sub> -H <sub>26A</sub> ...O <sub>1</sub> | 2.905 Å           |                                                      |                   |

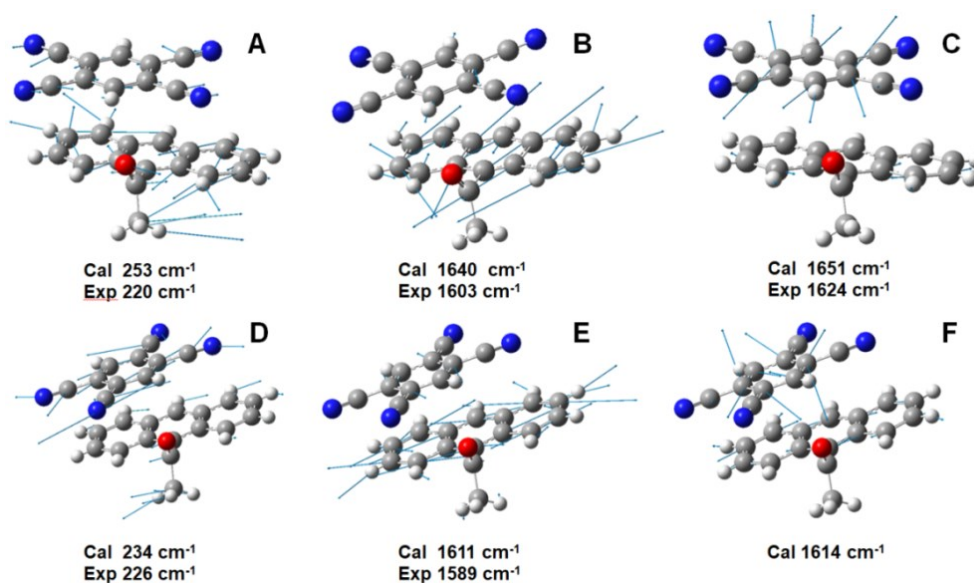**Fig. S5** In-plane  $\pi$ - $\pi$  vibration between ACA and TCNB in the (A-C) form  $\alpha$  and (D-F) form  $\beta$ .**Table S4.** The fluorescent lifetime of the form  $\alpha$  at 570, 580 and 590 nm, respectively.

| 570nm     |       | 580 nm    |       | 590 nm    |       |
|-----------|-------|-----------|-------|-----------|-------|
| Value(ns) | Rel % | Value(ns) | Rel % | Value(ns) | Rel % |
| 6.73      | 9.88  | 7.37      | 9.66  | 9.16      | 15.23 |
| 18.72     | 90.12 | 18.75     | 90.04 | 19.25     | 84.77 |

**Table S5** The fluorescent lifetime of the form  $\beta$  at 590, 610 and 630 nm, respectively.

| 590nm     |       | 610 nm    |       | 630 nm    |       |
|-----------|-------|-----------|-------|-----------|-------|
| Value(ns) | Rel % | Value(ns) | Rel % | Value(ns) | Rel % |
| 14.04     | 5.56  | 11.07     | 4.43  | 9.16      | 5.24  |

|       |       |       |       |       |       |
|-------|-------|-------|-------|-------|-------|
| 56.06 | 94.44 | 55.48 | 95.57 | 56.01 | 94.76 |
|-------|-------|-------|-------|-------|-------|

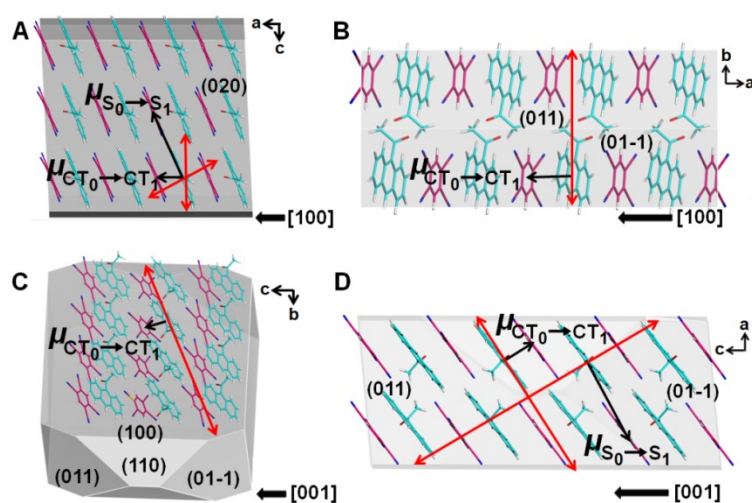

**Fig. S6** Transition dipole moments vector of  $CT_0$  to  $CT_1$  and  $S_0$  to  $S_1$  in the form  $\alpha$  viewed along the (A)  $[010]$ , (B)  $[001]$  directions, and that in form  $\beta$  viewed along the (C)  $[100]$ , (D)  $[010]$  directions, The vector  $\mu$  are marked as black single-headed arrows. The directions of the light propagation in the crystal are marked as red double-headed arrows. (A-D) Growth morphologies of the two forms are simulated using materials studio software.

The growth morphologies of the form  $\alpha$  and the form  $\beta$  polymorphic cocrystals were simulated via materials studio software. The ACA and TCNB molecules appear mixed stacking  $\cdots D-A-D-A \cdots$  along the direction of  $[100]$  in the form  $\alpha$  (Fig. S6A and S6B) and along the direction of  $[001]$  in the form  $\beta$  (Fig. S6C and S6D). Therefore, the form  $\alpha$  and the form  $\beta$  polymorphic cocrystals grow along the  $[100]$  and  $[001]$  directions, respectively.

The emitting light can travel around in the same plane which perpendicular to transition dipole moment ( $\mu$ ). Therefore, light propagation in the crystal were predicted by the vectors of  $\mu$  which from donor to acceptor. In the form  $\alpha$ , the composition vectors of  $\mu$  contain a  $CT_0$  to  $CT_1$  transition with parallel direction of the  $[100]$  and a  $S_0$  to  $S_1$  transition with an angle of  $\approx 60^\circ$  along the  $[100]$  direction (Black unfilled arrows represented the direction of  $\mu$  in the Fig. S6A and S6B), which lead to the optical wave can be transmitted along two directions of  $[001]$  and  $[100]$  with an angle of  $\approx 30^\circ$ . The directions of the light-wave propagation in form  $\beta$  are plotted in the Fig. S6C and S6D, the emitting light produced by  $CT_0$  to  $CT_1$  and  $S_0$  to  $S_1$

transitions can be travel in the crystal along the direction of [001] with an angle of  $\approx 60^\circ$  and  $30^\circ$ , respectively (Fig. S6C).

**Table S6** The distances of light propagation  $D_{b-t}$  and spatially resolved PL intensity from Fig. 4C.

| No | $D_{b-t}$ (mm) | Fluorescent Intensity ( $I_{body}$ or $I_{tip}$ ) |
|----|----------------|---------------------------------------------------|
| 1  | 0              | 21926                                             |
| 2  | 0.15           | 8601                                              |
| 3  | 0.25           | 5248                                              |
| 4  | 0.4            | 1757                                              |
| 5  | 0.42           | 978                                               |
| 6  | 0.5            | 726                                               |
| 7  | 0.625          | 612                                               |
| 8  | 0.77           | 535                                               |
| 9  | 0.92           | 577                                               |
| 10 | 1.1            | 615                                               |
| 11 | 1.2            | 477                                               |

**Table S7** The distances of light propagation  $D_{b-t}$  and spatially resolved PL intensity from Fig. 4E.

| No | $D_{b-t}$ (mm) | Fluorescent Intensity ( $I_{body}$ or $I_{tip}$ ) |
|----|----------------|---------------------------------------------------|
| 1  | 0              | 37246                                             |
| 2  | 0.15           | 21291                                             |
| 3  | 0.2            | 7119                                              |
| 4  | 0.25           | 2134                                              |
| 5  | 0.35           | 1890                                              |
| 6  | 0.5            | 1158                                              |

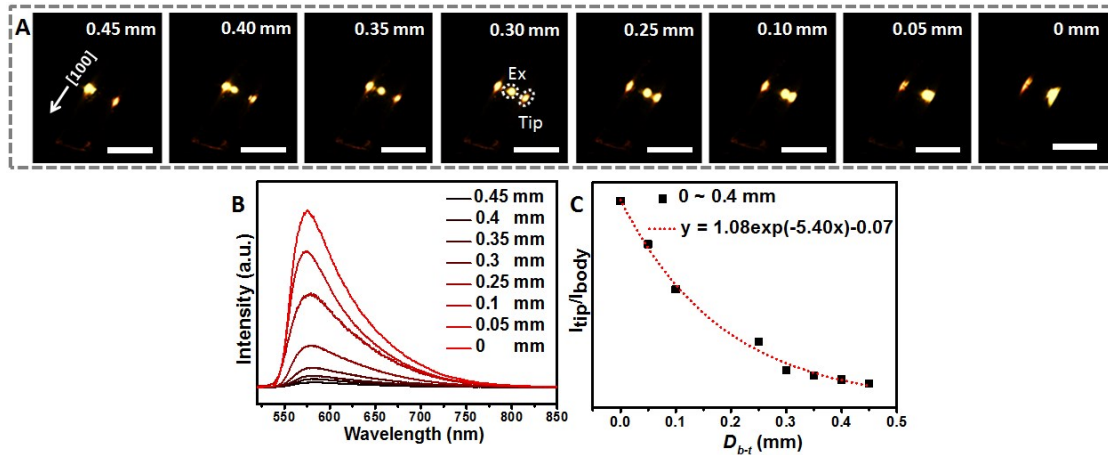

**Fig. S7** (A) PL micro-imagings of optical propagation in the form  $\alpha$ , the excitation spot moved perpendicular to the [100] axis (marked as 0.45 to 0 mm), white scale bars are 0.5 mm; (B) Spatially resolved PL spectra of out-coupled lights at the location of "Tip" in form  $\alpha$  from Fig. 7SA; (C) The fitting curves of  $I_{tip}/I_{body}$  with  $D_{b-t}$  from Fig. 7SB.

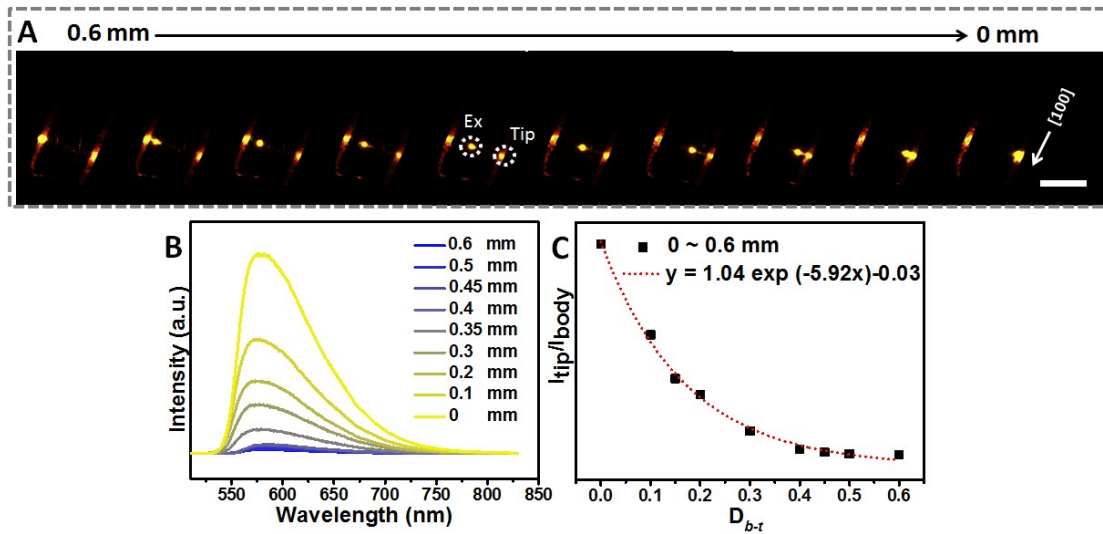

**Fig. S8** (A) PL micro-imagings of optical propagation in the form  $\alpha$ , the excitation spot moved perpendicular to the [100] axis (marked as 0.6 to 0 mm), white scale bar is 0.5 mm; (B) Spatially resolved PL spectra of out coupled lights at the location of “Tip” in form  $\alpha$  from Fig. 8SA; (C) The fitting curves of  $I_{\text{tip}}/I_{\text{body}}$  with  $D_{b-t}$  from Fig. 8SB.

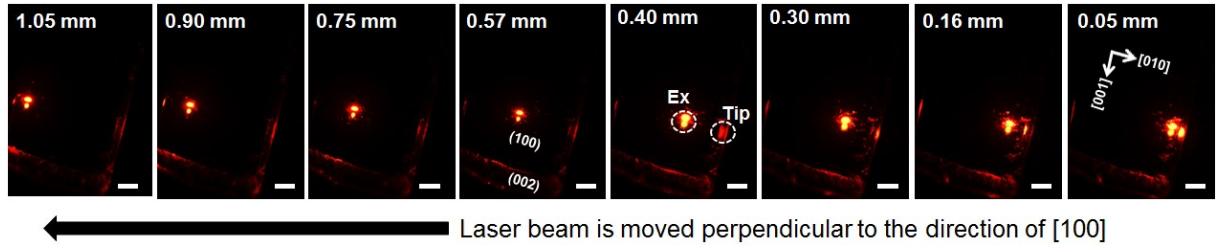

**Fig. S9** PL micro-imagings of form  $\beta$ , the incident laser beam from crystal tip to crystal body perpendicular the [001] axis with different distance  $D_{b-t}$ . The white scale bar is 0.25 mm.
